# Supplementary material for: Metagenomic and geochemical characterization of pockmarked sediments overlaying the Troll petroleum reservoir in the North Sea
Source: PubMed Central journal article supplement (PMC3478177; doi:10.1186/1471-2180-12-203), 2012-09-11

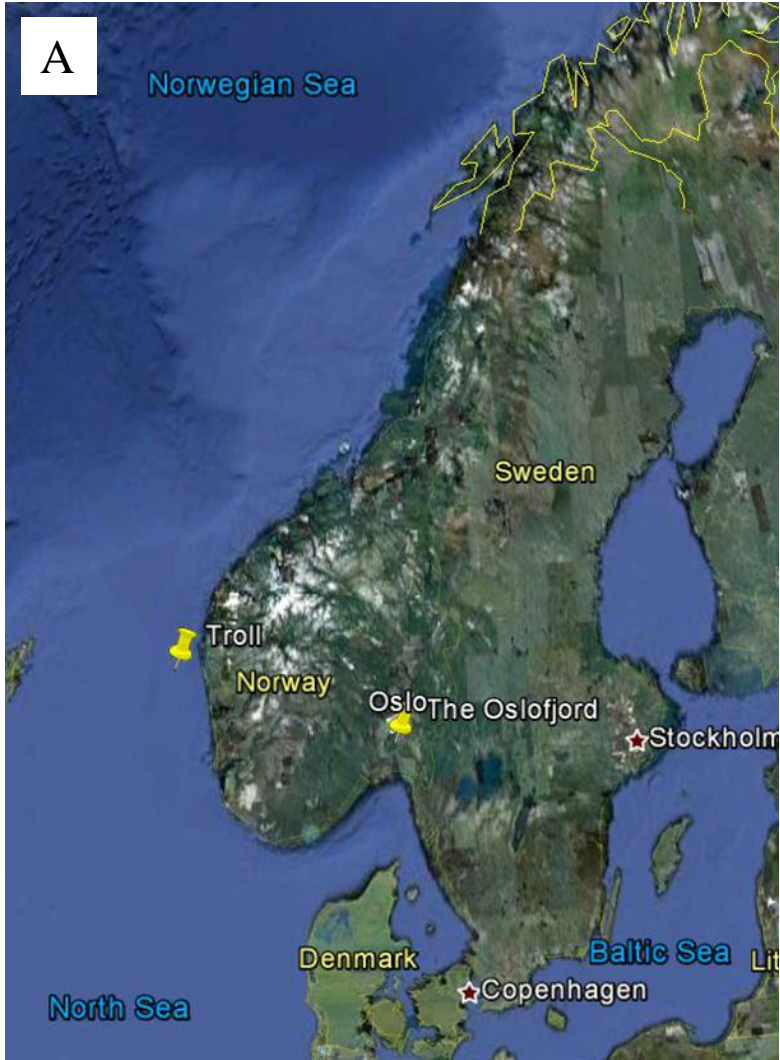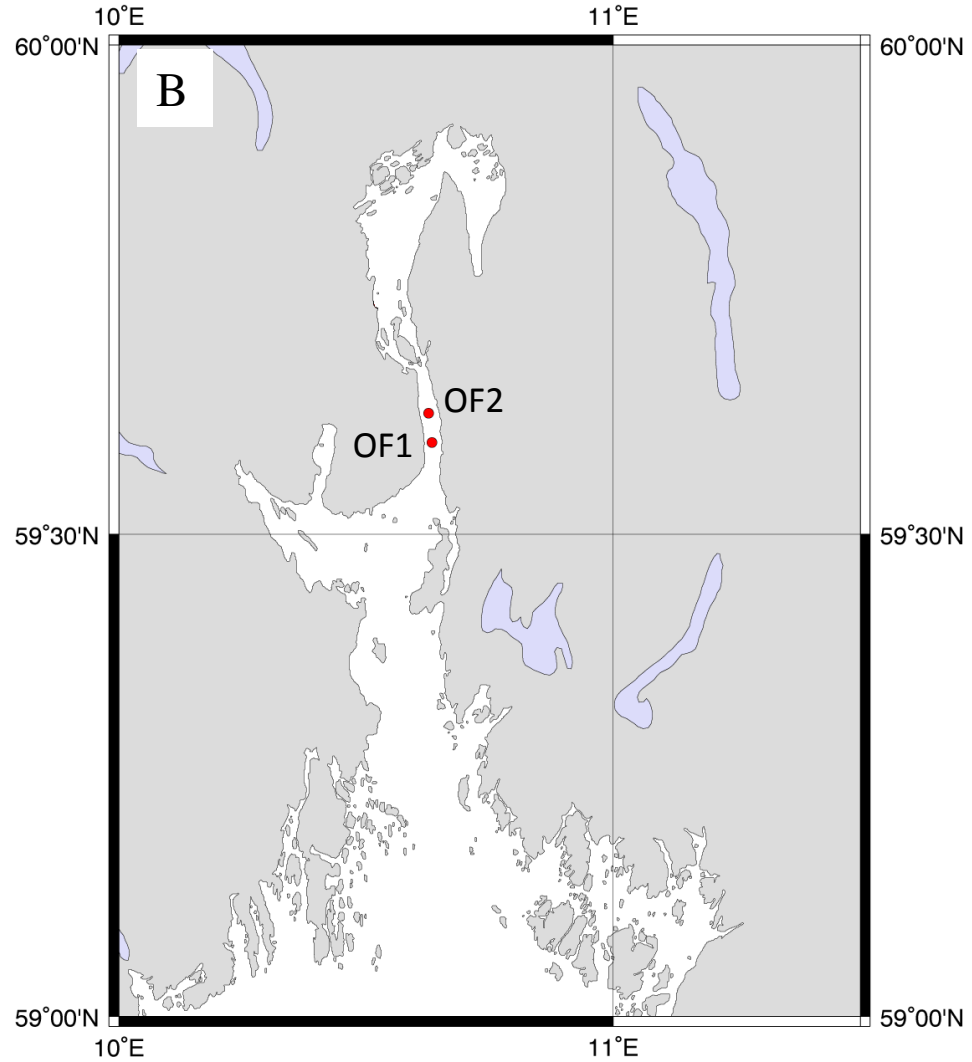

Supplement: 1471-2180-12-203-S1.pdf [file 1471-2180-12-203-S1.pdf]
