# Supplementary material for: Metagenomic and geochemical characterization of pockmarked sediments overlaying the Troll petroleum reservoir in the North Sea
Source: PubMed Central journal article supplement (PMC3478177; doi:10.1186/1471-2180-12-203), 2012-09-11
Supplement: 1471-2180-12-203-S6.pdf [file 1471-2180-12-203-S6.pdf]

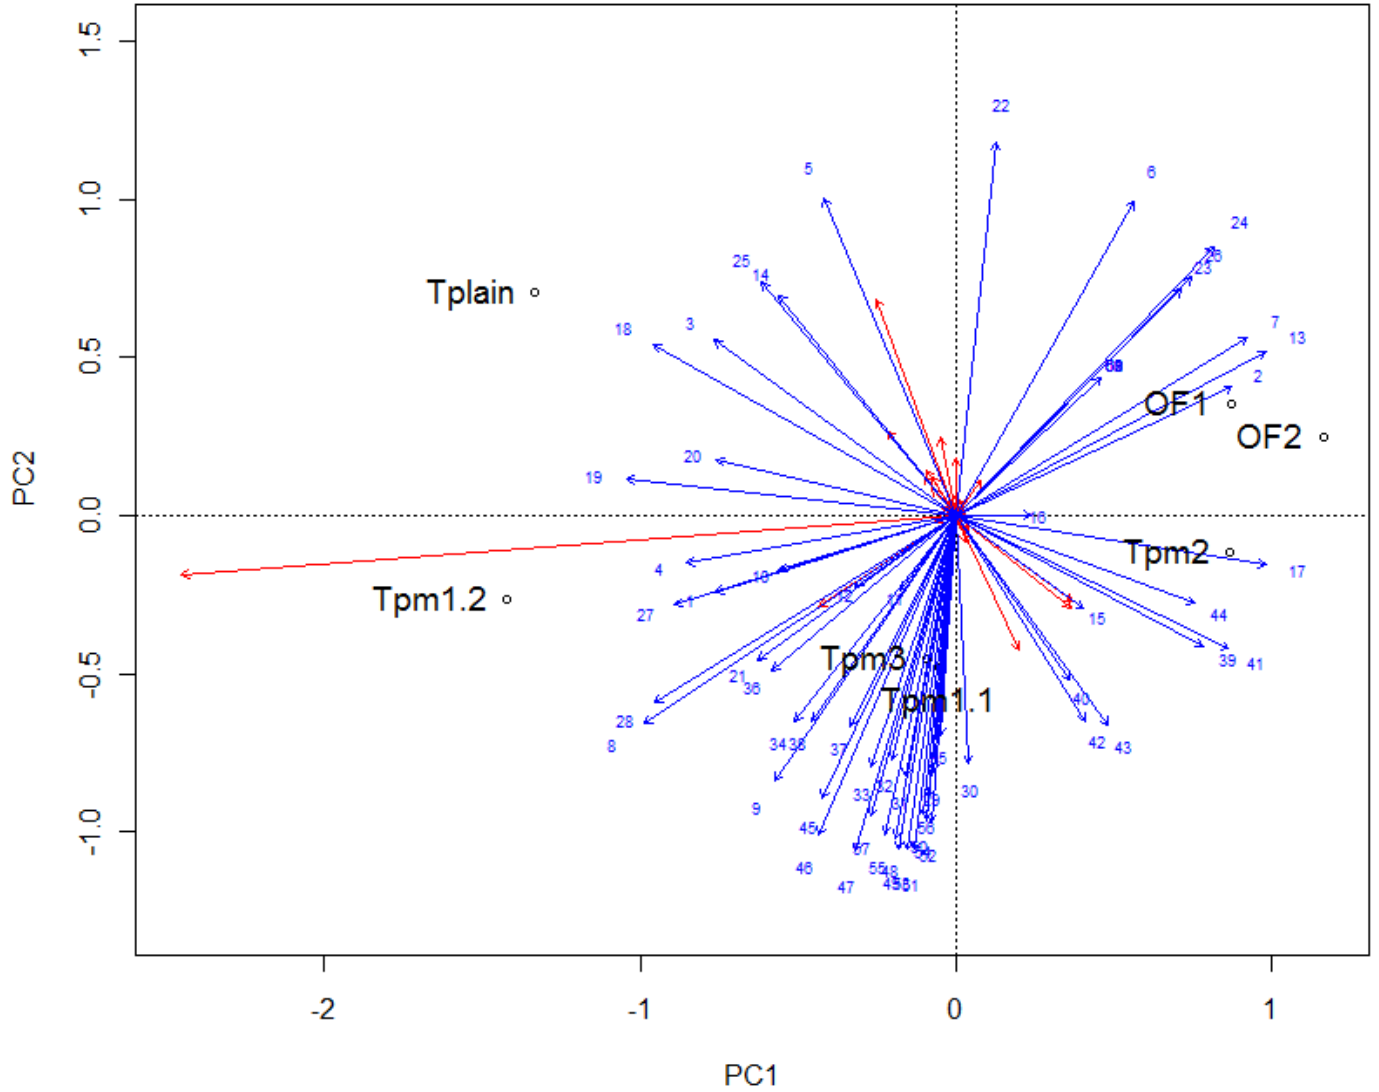

|           |              |           |       |           |       |           |       |
|-----------|--------------|-----------|-------|-----------|-------|-----------|-------|
| <b>1</b>  | Conductivity | <b>17</b> | Ba    | <b>33</b> | i-C14 | <b>49</b> | n-C23 |
| <b>2</b>  | NH3-N        | <b>18</b> | Cd    | <b>34</b> | n-C13 | <b>50</b> | n-C24 |
| <b>3</b>  | NO3-NO2-N    | <b>19</b> | Co    | <b>35</b> | i-C15 | <b>51</b> | n-C25 |
| <b>4</b>  | SO4-S        | <b>20</b> | Cr    | <b>36</b> | n-C14 | <b>52</b> | n-C26 |
| <b>5</b>  | Cl           | <b>21</b> | Cu    | <b>37</b> | i-C16 | <b>53</b> | n-C27 |
| <b>6</b>  | TOC          | <b>22</b> | Hg    | <b>38</b> | n-C15 | <b>54</b> | n-C28 |
| <b>7</b>  | HCO3-C       | <b>23</b> | Mn    | <b>39</b> | n-C16 | <b>55</b> | n-C29 |
| <b>8</b>  | Ca           | <b>24</b> | Mo    | <b>40</b> | i-C18 | <b>56</b> | n-C30 |
| <b>9</b>  | K            | <b>25</b> | Ni    | <b>41</b> | n-C17 | <b>57</b> | n-C31 |
| <b>10</b> | Mg           | <b>26</b> | P     | <b>42</b> | Pr    | <b>58</b> | n-C32 |
| <b>11</b> | Na           | <b>27</b> | Pb    | <b>43</b> | n-C18 | <b>59</b> | n-C33 |
| <b>12</b> | S            | <b>28</b> | Zn    | <b>44</b> | Ph    | <b>60</b> | n-C34 |
| <b>13</b> | Si           | <b>29</b> | n-C10 | <b>45</b> | n-C19 | <b>61</b> | n-C35 |
| <b>14</b> | Fe           | <b>30</b> | n-C11 | <b>46</b> | n-C20 | <b>62</b> | n-C36 |
| <b>15</b> | Sr           | <b>31</b> | n-C12 | <b>47</b> | n-C21 |           |       |
| <b>16</b> | Al           | <b>32</b> | i-C13 | <b>48</b> | n-C22 |           |       |
